# Supplementary material for: Engineered mesenchymal stem cell-derived exosomes with high CXCR4 levels for targeted siRNA gene therapy against cancer
Source: Royal Society of Chemistry journal article supplement (doi:10.1039/d1nr08170e), 2022-01-01
Supplement: d1nr08170e1.pdf [file d1nr08170e1.pdf]

# Supplementary Information

## **Engineered mesenchymal stem cell-derived exosomes with high CXCR4 levels for targeted siRNA gene therapy against cancer**

Shuyue Xu,<sup>a</sup> Bin Liu,<sup>\*b,c</sup> Junyi Fan,<sup>d</sup> Cuili Xue,<sup>b,c</sup> Yi Lu,<sup>b,c</sup> Can Li<sup>\*a</sup> and Daxiang Cui<sup>\*b,c</sup>

\* Corresponding authors

<sup>a</sup>Bio-X Institutes, Key Laboratory for the Genetics of Developmental and Neuropsychiatric Disorders (Ministry of Education), Shanghai Jiao Tong University, 1954 Huashan Road, Shanghai 200030, China.

E-mail: lican@live.cn

<sup>b</sup>Institute of Nano Biomedicine and Engineering, Shanghai Engineering Research Centre for Intelligent Diagnosis and Treatment Instrument, Department of Instrument Science and Engineering, School of Electronic Information and Electrical Engineering, Shanghai Jiao Tong University, 800 Dongchuan RD, Shanghai 200240, PR China. E-mail: dx cui@s jtu.edu.cn, lovesjtu@s jtu.edu.cn

<sup>c</sup>National Center for Translational Medicine, Collaborative Innovational Center for System Biology, Shanghai Jiao Tong University, 800 Dongchuan Road, Shanghai 200240, PR China

<sup>d</sup>Joint International Research Laboratory of Metabolic and Developmental Sciences, School of Life Sciences and Biotechnology, Shanghai Jiao Tong University, Shanghai 200240, China

Fig. S1

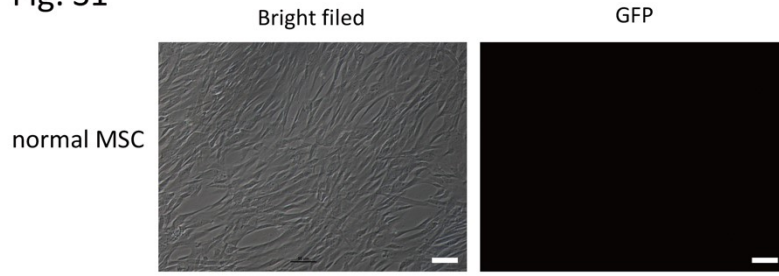

**Fig. S1. Morphological characteristics of normal MSCs.** Confocal microscopy

images of normal MSCs. Scale bar: 50  $\mu$ m.

**Fig.S2**

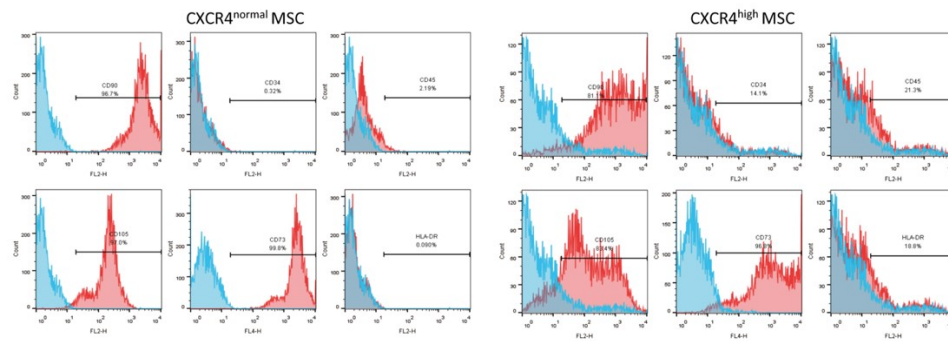

**Fig. S2. Characterization of normal MSCs.** Expression of signature proteins (CD90,

CD34, CD45, CD105, CD73, HLA-DR) on the surface of MSCs surface measured by

flow

cytometry.

Fig. S3

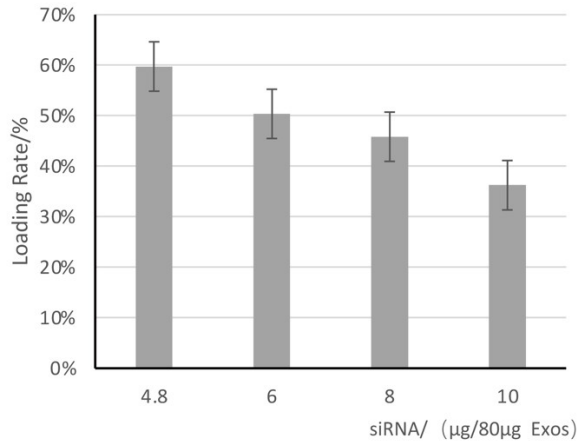

**Fig. S3. The efficiency of loading siRNA into exosomes by electrotransfer.** The post-electroporation exosomes were treated with RNase A, gel electrophoresis experiments were performed, and band brightness was analyzed via ImageJ.

Fig. S4

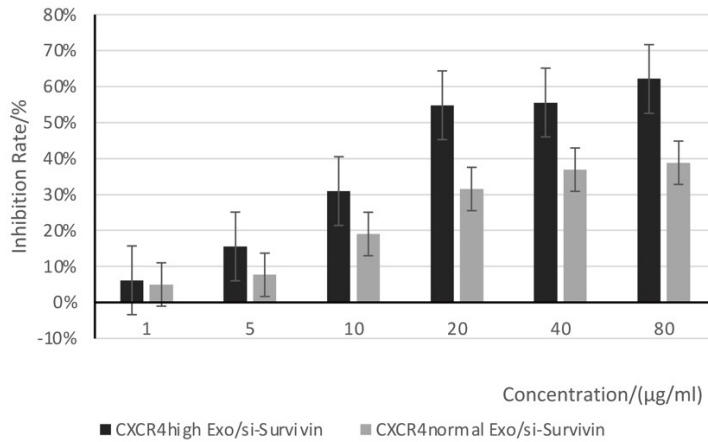

**Fig. S4. Test of the best drug concentration of MGC803 cells.** MGC803 cells were cocultured with different concentrations of CXCR4<sup>high</sup> Exo/si-Survivin and CXCR4<sup>normal</sup> Exo/si-Survivin. The absorbance was measured after 24 hours and statistics were analyzed.

Fig. S5

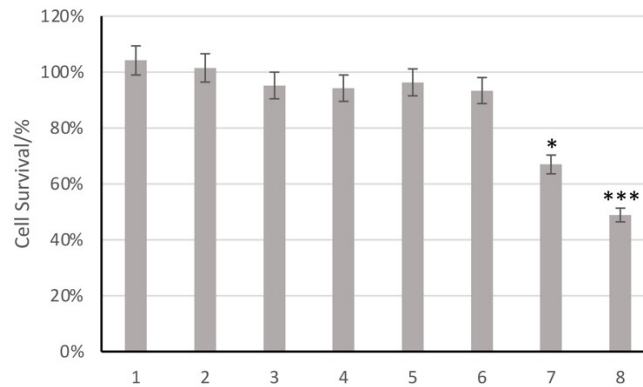

**Fig. S5. *In vitro* therapeutic effect of exosomes.** CKK-8 assay of MGC803 cells treated with Exos+siRNA or Exos/siRNA after 24h. Data are presented as the mean  $\pm$  SEM,  $0.01 < *p < 0.05$ ,  $**p < 0.01$ ,  $***p < 0.001$ . (n = 6 per group) 1: PBS; 2: naked si-Survivin; 3: CXCR4<sup>normal</sup> Exo/si-NC; 4: CXCR4<sup>high</sup> Exo/si-NC; 5: CXCR4<sup>normal</sup> Exo+si-Survivin; 6: CXCR4<sup>high</sup> Exo+si-Survivin; 7: CXCR4<sup>normal</sup> Exo/si-Survivin; 8: CXCR4<sup>high</sup> Exo/si-Survivin.

Fig. S6

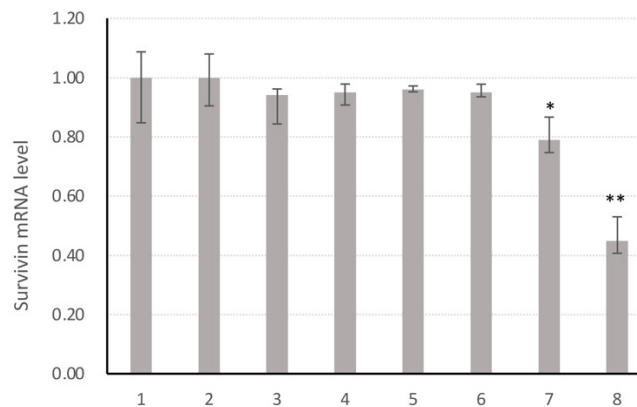

**Fig. S6. Survivin expression in MGC803 cells.** RT-PCR analysis of the expression of Survivin mRNA in MGC803 cells after transfection with different agents for 24 h. The expression level was relative to that in the PBS group. Data are presented as the mean  $\pm$  SEM,  $0.01 < *p < 0.05$ ,  $**p < 0.01$ ,  $***p < 0.001$ . (n = 6 per group). 1: PBS; 2:

naked si-Survivin; 3: CXCR4<sup>normal</sup> Exo/si-NC; 4: CXCR4<sup>high</sup> Exo/si-NC; 5: CXCR4<sup>normal</sup> Exo+si-Survivin; 6: CXCR4<sup>high</sup> Exo +si-Survivin; 7: CXCR4<sup>normal</sup> Exo/si-Survivin; 8: CXCR4<sup>high</sup> Exo/si-Survivin.

Fig. S7

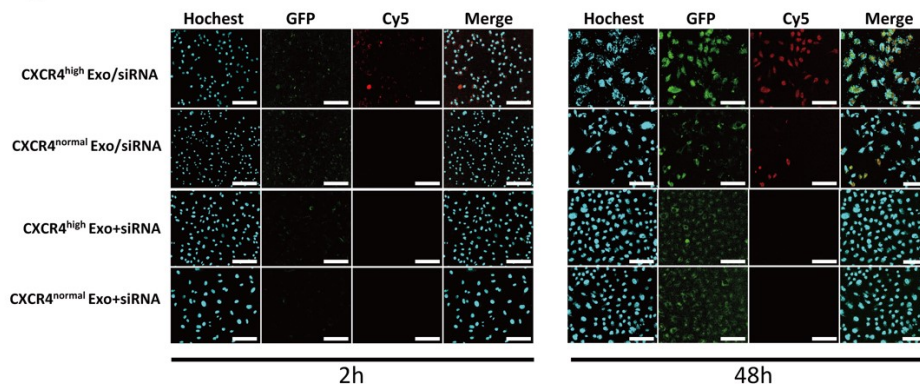

**Fig. S7. Cellular uptake of exosomes.** Confocal microscopy images of A549 cells co-cultured with CXCR4<sup>high</sup> Exo/si-Survivin, CXCR4<sup>normal</sup> Exo/si-Survivin, CXCR4<sup>high</sup> Exo and CXCR4<sup>normal</sup> Exo for several hours separately. Exosomes were labeled with GFP (green), and siRNA was conjugated with Cy5 (Red). Scale bar: 100  $\mu$ m.

Fig. S8

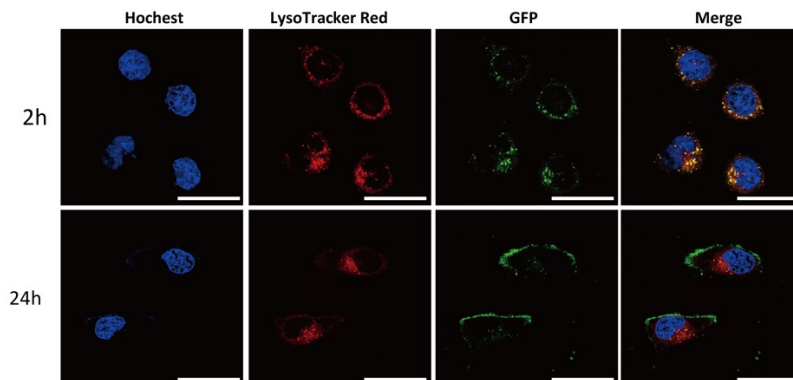

**Fig. S8. Escape of exosomes in MGC803 cells.** Localization of lysosome (LysoTracker, Red) and exosomes (GFP, Green) at different time points. Scale bar: 50  $\mu$ m.

Fig. S9

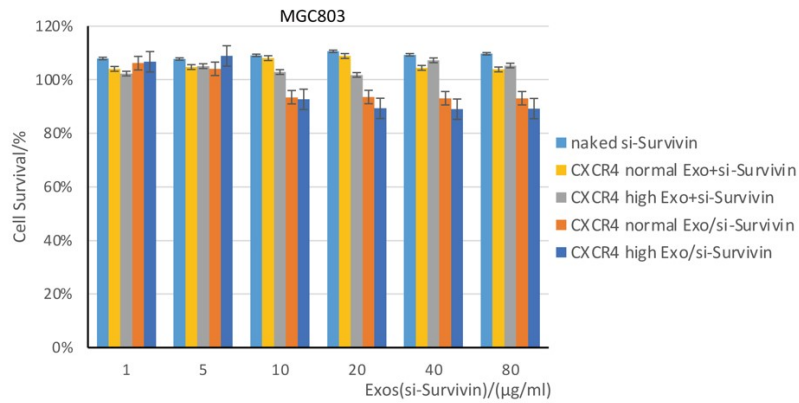

**Fig. S9. Cytotoxicity testing of exosomes.** MGC803 cells were cocultured with different types of exosomes, the cytotoxicity of which was detected by CCK8.

Fig. S10

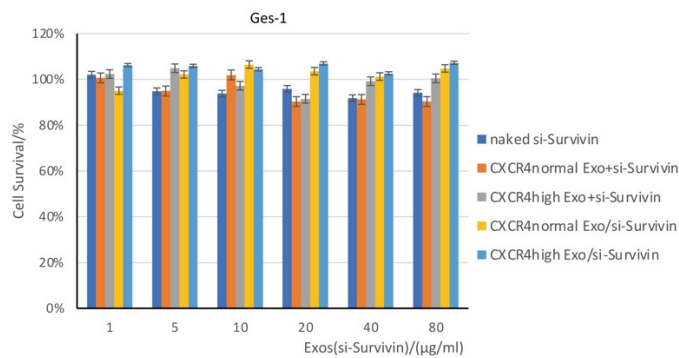

**Fig. S10. Cytotoxicity testing of exosomes.** Ges-1 cells were cocultured with different types of exosomes, the cytotoxicity of which was detected by CCK8.

Fig. S11

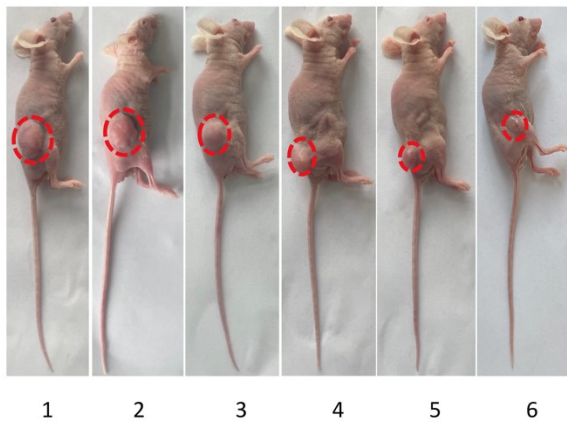

Fig. S11 **Treatment effect of exosomes.** Photographs of nude mice in different experimental groups after 21 days of treatment.
